# Supplementary material for: Le statut de la pluriactivité en droit social
Source: JCI journal article supplement (doi:10.1172/jci29602), 1999-01-01
Supplement: sd1 [file 1]

Supplementary Figure 1 Splenic and bone marrow derived dendritic cells (DCs) from NOD and NOD-PI mice present antigen equally. CD8<sup>+</sup> T cells from NOD8.3 mice were stimulated with IGRP<sub>206-214</sub> peptide loaded (0.1μM), irradiated, **A**, splenic or **B**, bone marrow-derived DCs (10<sup>4</sup> cells/well) from NOD or NOD-PI mice (8 week old donors). Proliferation of NOD8.3 CD8<sup>+</sup> T cells was assessed by thymidine incorporation after 3 days in a standard in vitro proliferation assay. *P*values: NOD versus NOD-PI in bone marrow derived DCs, *P*=ns, NOD versus NOD-PI in splenic DCs, *P*=ns. **C**, Spontaneous CD4<sup>+</sup> T cell response to IGRP peptide. Splenic T cells (4X10<sup>5</sup>) from 8-week old NOD and NOD-IGRP mice were cultured with or without 100μg/ml of IGRP<sub>4-22</sub> peptide. Proliferation of T cells was assessed by thymidine incorporation after 3 days in a standard in vitro proliferation assay. *P*<0.001, NOD versus NOD-IGRP T cells stimulated with peptide

Supplementary Figure 2 **A**, CFSE-labelled CD8<sup>+</sup> T cells isolated from NOD8.3 TCR transgenic mice were injected intravenously (4-6× 10<sup>6</sup> cells/mouse) along with CD4<sup>+</sup>CD25<sup>+</sup> or CD4<sup>+</sup>CD25<sup>-</sup> cells (4-6× 10<sup>6</sup> cells/mouse) from NOD-PI mice into 8 week old NOD mice (n=4 per group). Recipients were sacrificed 3 days later and their PLN and ILN examined for CFSE<sup>+</sup> cells. **B**, CD4<sup>+</sup>CD25<sup>-</sup> T cells from splenocytes of NOD mice (responder cells) were stimulated with antibody to CD3. These responder cells were cultured along with various numbers of CD4<sup>+</sup>CD25<sup>+</sup> cells from splenocytes of NOD or NOD-PI mice (regulator cells). Proliferation of T cells was assessed by thymidine incorporation after 3 days in a standard in vitro proliferation assay.

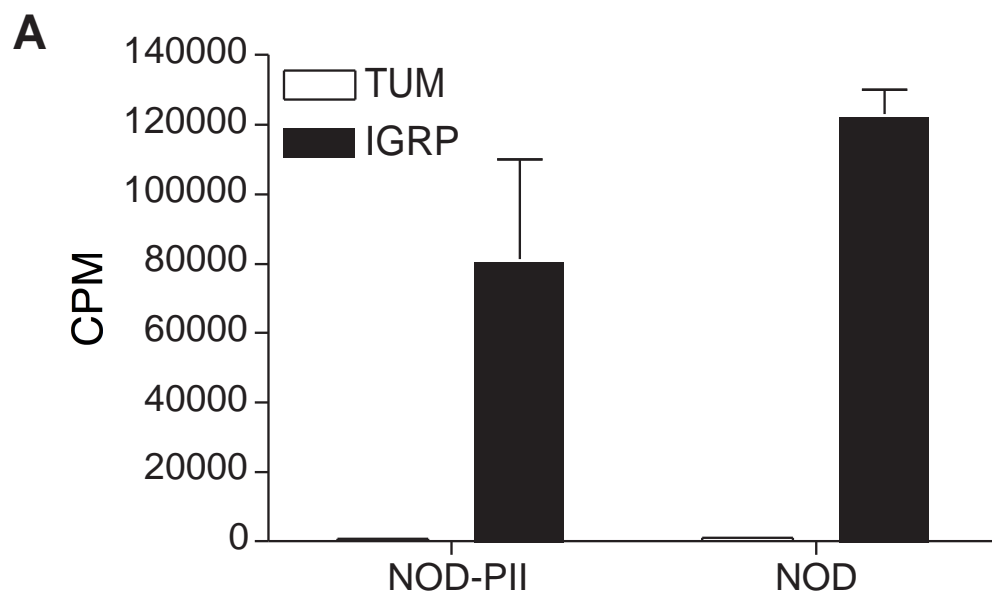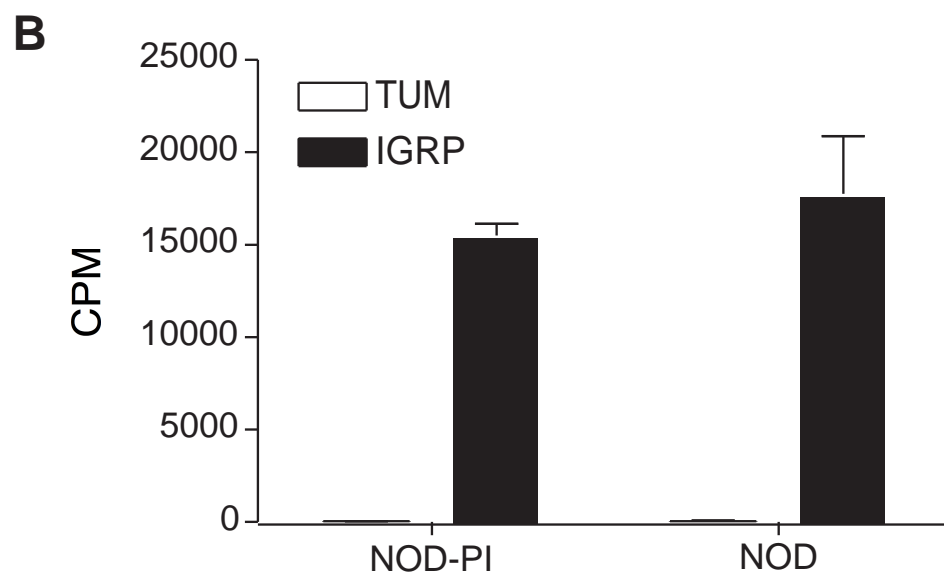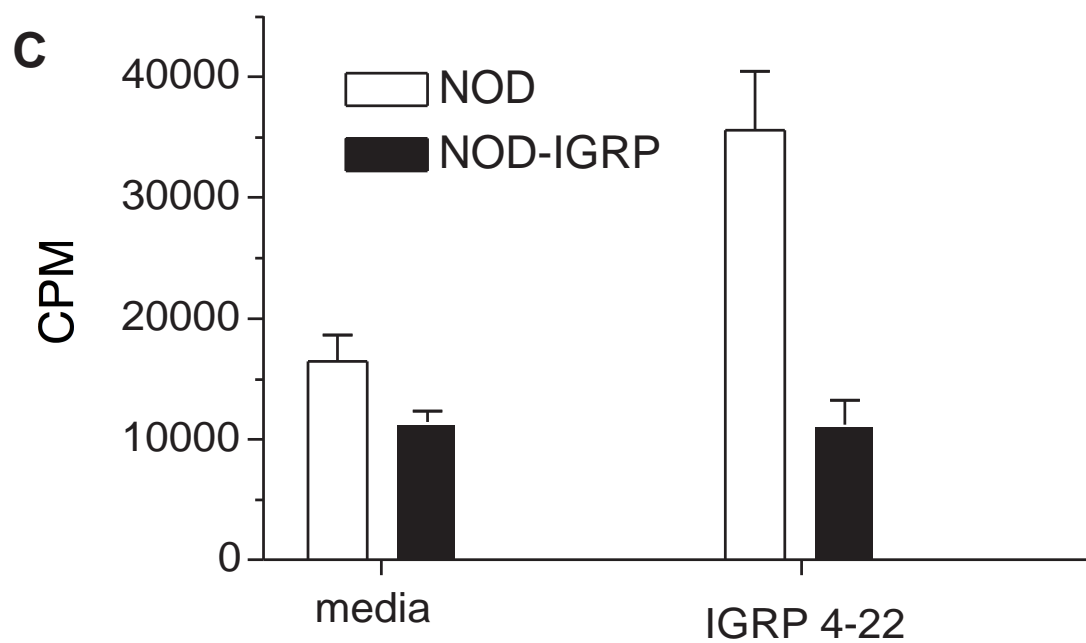

SUPPLEMENTARY FIGURE 1

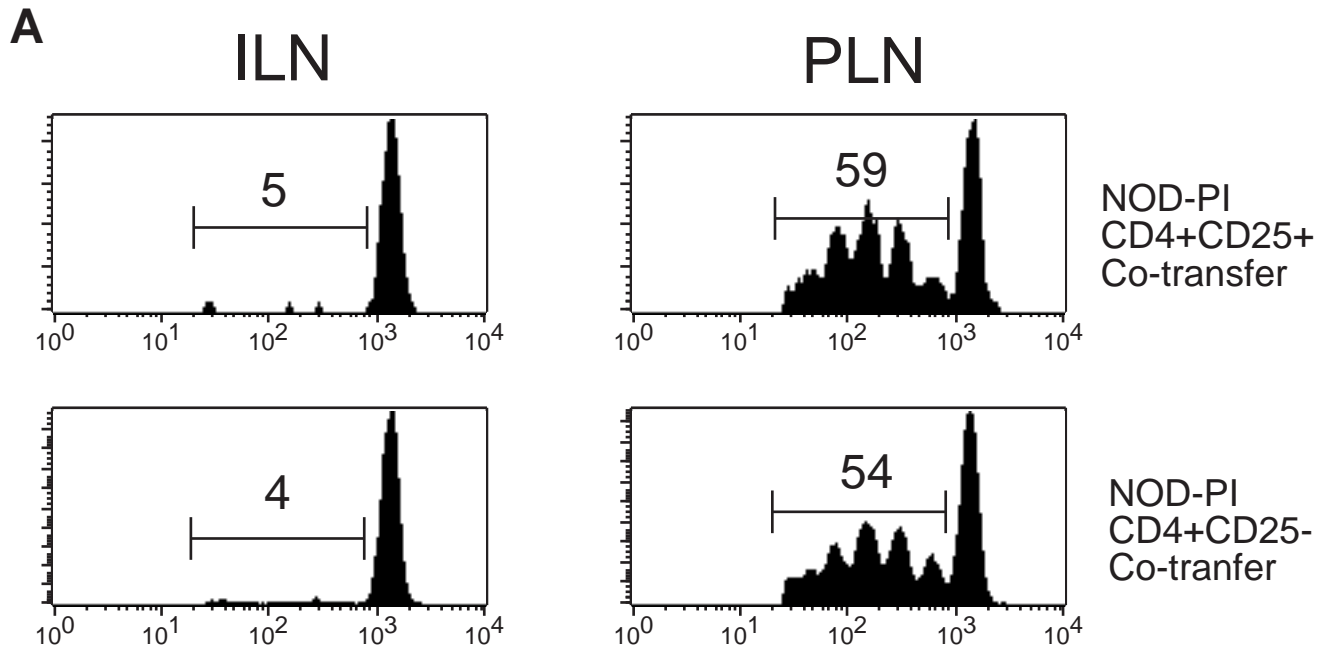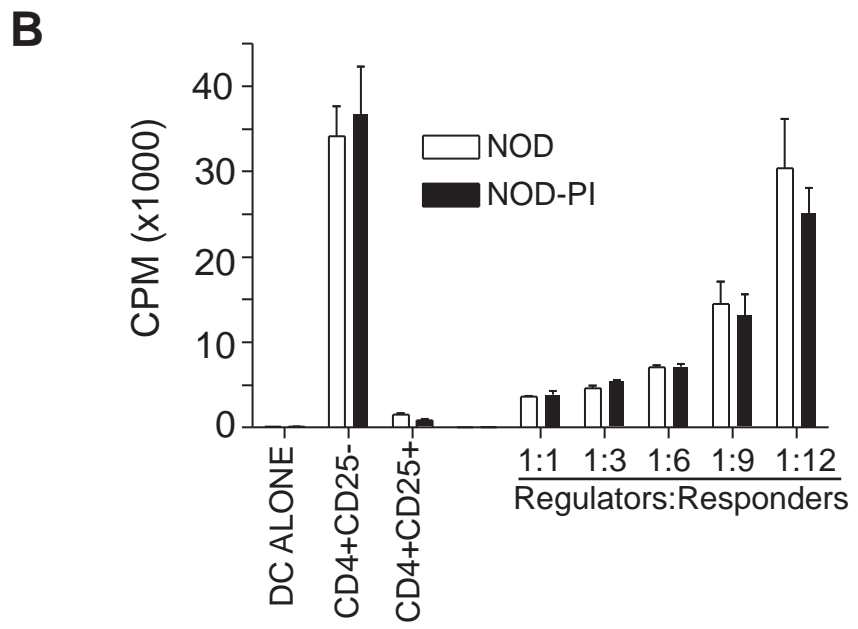

SUPPLEMENTARY FIGURE 2
